# Supplementary material
Source: publisher site journal article supplement (https://www.dovepress.com/article/297081)
Supplement: Supplementary file 1 [file get_supplementary_file.php]

Supplementary Table 1. The Primers of LncRNAs and mRNAs for QT-PCR.

| **LncRNAs and mRNAs** | **Primer (5’-3’)** |
| --- | --- |
| β-actin | Forward: TACTGCCCTGGCTCCTAGCA  Reverse: TGGACAGTGAGGCCAGGATAG |
| Caspase-1 | Forward: GGCAGCCTTGTCCCTTGAAGAG  Reverse: GTAGCCCACGTCGTAGCAAACC |
| IL-1β | Forward: ATGAGGACCCAAGCACCTTC  Reverse: ACCACTTGTTGGCTTATGTTCTG |
| IL-6 | Forward: CATTCTGTCTCGAGCCCACC  Reverse: GCTGGAAGTCTCTTGCGGAG |
| IL-18 | Forward: AAAGTGCCAGTGAACCC  Reverse: TTTGATGTAAGTTAGTGAGAGTGA |
| TNF-α | Forward: ATGGGCTCCCTCTCATCAGT  Reverse: GCTTGGTGGTTTGCTACGAC |
| NLRP3 | Forward: AACTTGCAGAAGCTGGGGTT  Reverse: GGTGCAGAAGTCCCTCACAG |
| LncRNA4344 | Forward: ACCCAGAAGCTTGGAGGATAGAG  Reverse: GGCTGCAGTTGTCTAACCTTTGAG |

**Abbreviations:** qRT-PCR, quantitative real-time reverse transcriptase-PCR; NLRP3, Nod-like receptor protein-3; IL‐1β, interleukin(IL)‐1β; IL‐6: interleukin(IL)‐6; IL-18: interleukin(IL)-18; LPS, lipopolysaccharides; NLRP3, Nod-like receptor protein-3; TNF-α: tumor necrosis factor-α.
